# Supplementary material
Source: PubMed Central journal article supplement (PMC4772600)
Supplement: JB.00964-15_zjb999093968so1.pdf [file JB.00964-15_zjb999093968so1.pdf]

## **SUPPLEMENTAL MATERIAL**

Sibling rivalry in *Myxococcus xanthus* is mediated by kin recognition and a polyploid prophage

Arup Dey, Christopher N. Vassallo, Austin C. Conklin, Darshankumar T. Pathak, Vera Troselj, and

Daniel Wall

Department of Molecular Biology

University of Wyoming

1000 E. University Ave.

Laramie, WY 82071, U.S.A.

## SUPPLEMENTAL TEXT

**Sibling antagonism does not correlate to phenotypic differences in S-motility.** We sought to investigate whether strain antagonism was correlated to phenotypic differences in motility between strains. To test this, we systematically assayed all possible combinations of motility phenotypes when strains were mixed and strain fitness was monitored by fluorescence microscopy. This method was chosen because it avoids technical problems associated with severe cell clumping of S-motile strains propagated on agar (unpublished results). First, we found that wild type (WT; A<sup>+</sup>S<sup>+</sup>) suffered a near 100-fold decrease in fitness when mixed with an A<sup>-</sup>S<sup>+</sup> strain (Fig. S2A). Similarly, a >10-fold decrease in the WT fitness occurred when mixed with a nonmotile strain (A<sup>-</sup>S<sup>-</sup>). Although WT was outcompeted by both strains, the A<sup>-</sup>S<sup>+</sup> strain reproducibly did so at a faster rate and to a larger degree (data not shown). In contrast, when WT was mixed with an A<sup>+</sup>S<sup>-</sup> strain there was no antagonism (Fig. S2A). Similarly, when both strains lacked A-motility (A<sup>-</sup>S<sup>-</sup> versus A<sup>-</sup>S<sup>+</sup>), there was no antagonism (Fig. S2B). However, similar to WT, the A<sup>+</sup>S<sup>-</sup> strain was outcompeted by both the A<sup>-</sup>S<sup>+</sup> and A<sup>-</sup>S<sup>-</sup> strains by nearly 100-fold (Fig. S2B). These antagonistic interactions were confirmed when an A<sup>-</sup>S<sup>+</sup> strain was found to inhibit an A<sup>+</sup>S<sup>-</sup> strain from swarming, which also was Tra dependent (Fig. S3). In summary, in these experiments, A-motile strains were antagonized by strains that lacked A-motility. In contrast, when both strains had identical A-motility phenotypes (A<sup>-</sup> or A<sup>+</sup>) they interacted harmoniously. These findings raised the possibility that phenotypic differences in A-motility led to killing.

***aglB1* is allelic to *aglQ* and does not cause antagonism.** The A-motility defects described in the above strains were all caused by the mutation *aglB1*. We sought to identify the gene associated with *aglB1* for two reasons: (i) the *aglB1* mutation was correlated with the kill phenotype, and (ii) the *aglB1* allele resides in DK1217, which is the parental strain used for the construction of DK1622 (1). DK1217 (A<sup>-</sup>S<sup>+</sup>) was made *aglB*<sup>+</sup> by phage transduction from the A-motile YS donor strain (see Fig. 5 for strain construction history). Because DK1217 and DK1622 are presumed isogenic strains and do not contain antibiotic markers, DK1217 was used by us and others as a reference A<sup>-</sup>S<sup>+</sup> strain. To identify the *aglB1* mutation, the Tn5-Ω2213 insertion, which was 73% co-transducible with the *aglB* locus (data not shown), was sequenced. This insertion resides in MXAN\_6867 and was therefore linked to the *aglRQS* operon (MXAN\_6862/61/60) known to be involved in A-motility (2, 3). To test if the *aglB1* mutation was in *aglRQS*, the WT operon was cloned (pDP110) and found to rescue the A-motility defect of two *aglB1* strains (DK1217 and DK8601). This operon was sequenced from an *aglB1* mutant, and two mutations were found in *aglQ* (MXAN\_6861). One mutation was silent and the other mutation was in codon 36 (TTC→ATC), resulting in a Phe→Ile substitution in a predicted transmembrane helix. Consistent with reports that AglQ functions as part of the A-motility motor (3), time-lapse microscopy studies found that *aglB1* mutants completely lacked single cell movements (data not shown). We conclude that *aglB1* is allelic to *aglQ* (F36→I) and this mutation abolishes A-motility.

To test whether phenotypic differences in A-motility caused by *aglB1* have a role in antagonism, this mutation was rescued in strain DK1217, yielding DW2401. This A<sup>+</sup>S<sup>+</sup> strain was then mixed with a nonmotile aggressor (DK8601) and, importantly, no swarm inhibition was observed (Fig. S4A). In addition, DW2401 was mixed with a susceptible strain, and its ability to kill was identical to that of the DK1217 parental strain (Fig. S4B). In contrast, DK1622 did not antagonize the indicator strain. These results show that phenotypic differences in A-motility do not cause antagonistic interactions.

**Table S1** Plasmids and primers used in this study

| Plasmid/Primer      | Relevant properties                                                                 | Source            |
|---------------------|-------------------------------------------------------------------------------------|-------------------|
| Plasmids            |                                                                                     |                   |
| pCR2.1-TOPO         | Cloning vector, Km <sup>r</sup>                                                     | Life Technologies |
| pCR-XL-TOPO         | Cloning vector, Km <sup>r</sup> Zm <sup>r</sup>                                     | Life Technologies |
| pAD3                | <i>omrB</i> (insertion cassette) in pCR2.1 TOPO XL, Km <sup>r</sup> Zm <sup>r</sup> | (4)               |
| pAD4                | <i>traA</i> (insertion cassette) in pCR2.1 TOPO XL, Km <sup>r</sup> Zm <sup>r</sup> | This study        |
| pCV101              | ΔMx alpha cassette in pBJ114, Gal <sup>s</sup> Km <sup>r</sup>                      | This study (5)    |
| pDP1                | <i>P<sub>pilA</sub>-SS<sub>IM</sub>-mCherry</i> in pCR2.1 TOPO TA, Km <sup>r</sup>  | (6)               |
| pDP2                | <i>traA</i> (insertion cassette) in pCR2.1 TOPO TA, Km <sup>r</sup>                 | (7)               |
| pDP25               | <i>P<sub>pilA</sub>-traA<sup>M. fulvus</sup></i> in pSWU19, Km <sup>r</sup>         | (8)               |
| pDP110              | <i>aglQRS (aglB)</i> in pCR2.1 TOPO TA, Km <sup>r</sup>                             | This study        |
| pTdTomato           | <i>P<sub>IPTG</sub>-td-Tomato</i> in pMR3487, Tc <sup>r</sup>                       | Shimkets lab      |
| pXW6                | <i>P<sub>pilA</sub>-SS<sub>OM</sub>-mCherry</i> in pKSAT, Sm <sup>r</sup>           | (6)               |
| Primers             |                                                                                     |                   |
| <i>aglQRS</i> FWD   | ACGCGTCCTTCTTCACAAAC                                                                | This study        |
| <i>aglQRS</i> REV   | GACGTCAGGTCTGGAAGGTC                                                                | This study        |
| Mx-alphaDelUp-F     | AACAGCTATGACCATGATTACGCCAAGCTTCAGACCGAGCAGATCCCTAG                                  | This study        |
| Mx-alphaDelUp-R     | ATCGCCGAGAACGCCAATAGCCCCAAGACTCCA                                                   | This study        |
| Mx-alphaDelDn-F     | TTGGGGCTATTGGCGTTCTCGGCGATTCTCTGA                                                   | This study        |
| Mx-alphaDelDn-R     | CGACGTTGTAACGACGGCCAGTGAATCCCATCCTCTCCGTCACCTT                                      | This study        |
| MXF1DRAFT_07228 FWD | GAGTCGATACCCACGCACT                                                                 | This study        |
| MXF1DRAFT_07228 REV | GAAGACGATGACTCCCGCTA                                                                | This study        |
| <i>traA</i> KO FWD  | TCACTGTCTTGTCGGTGTGC                                                                | (7)               |
| <i>traA</i> KO REV  | GCCGTTGATGACCTGATAC                                                                 | (7)               |

**Table S2** Mx alpha polyploid units

|                          |                                          | <b>DZF1 Mx alpha paralogs; locus tag (DZF1DRAFT#); % amino acid identity</b> |                  |
|--------------------------|------------------------------------------|------------------------------------------------------------------------------|------------------|
| <b>DK1622 locus tags</b> | <b>Predicted functions</b>               | <b>Unit 1</b>                                                                | <b>Unit 2</b>    |
| MXAN_1800                | transposase, IS4 family                  | none                                                                         |                  |
| MXAN_1801                | RibD domain protein                      | none                                                                         | 07452; <b>96</b> |
| MXAN_1802                | hypothetical protein                     | 07211; <b>90</b>                                                             | 07453; <b>84</b> |
| MXAN_1803                | hypothetical protein                     | none                                                                         |                  |
| MXAN_1805                | hypothetical protein                     | none                                                                         |                  |
| MXAN_1806                | hypothetical protein                     | none                                                                         |                  |
| MXAN_1808                | putative restriction/modification enzyme | none                                                                         |                  |
| MXAN_1809                | hypothetical protein                     | none                                                                         |                  |
| MXAN_1810                | RDD family protein                       | 07206; <b>89</b>                                                             | 07459; <b>92</b> |
| MXAN_1811                | PBS lyase HEAT-like repeat protein       | 7205; <b>88</b>                                                              | 07460; <b>94</b> |
| MXAN_1812                | hypothetical protein                     | 7202; <b>37</b>                                                              | 07463; <b>39</b> |
| MXAN_1813                | hypothetical protein                     | none                                                                         | 07464; <b>31</b> |
| MXAN_1814                | hypothetical protein                     | none                                                                         | 07465; <b>30</b> |
| MXAN_1815                | hypothetical protein                     | 07199; <b>37</b>                                                             | 07466; <b>38</b> |
| MXAN_1816                | hypothetical protein                     | 07198; <b>67</b>                                                             | 07467; <b>66</b> |
| MXAN_1817                | hypothetical protein                     | none                                                                         | 07468; <b>95</b> |
| MXAN_1818                | hypothetical protein                     | 07197; <b>100</b>                                                            | 07469; <b>99</b> |
| MXAN_1819                | hypothetical protein                     | 07196; <b>93</b>                                                             | 07470; <b>88</b> |
| MXAN_1820                | hypothetical protein                     | 07195; <b>97</b>                                                             | 07471; <b>92</b> |
| MXAN_1821                | hypothetical protein                     | 07193; <b>97</b>                                                             | 07473; <b>95</b> |
| MXAN_1822 <sup>a</sup>   | hypothetical protein                     | 07191; <b>44</b>                                                             | none             |
| MXAN_1823                | hypothetical protein                     | none                                                                         |                  |
| MXAN_1824 <sup>a</sup>   | hypothetical protein                     | 07272; <b>38</b>                                                             | 07474; <b>95</b> |
| MXAN_1826 <sup>a</sup>   | hypothetical protein                     | 07273; <b>75</b>                                                             | 07192; <b>54</b> |
| MXAN_1827                | hypothetical protein                     | none                                                                         |                  |
| MXAN_1828                | hypothetical protein                     | none                                                                         |                  |
| MXAN_1829                | hypothetical protein                     | 07271; <b>99</b>                                                             | 07190; <b>83</b> |
| MXAN_1831                | hypothetical protein                     | 07270; <b>97</b>                                                             | 07189; <b>85</b> |
| MXAN_1832                | hypothetical protein                     | 07268; <b>96</b>                                                             | 07188; <b>85</b> |
| MXAN_1833                | hypothetical protein                     | 07267; <b>99</b>                                                             | none             |
| MXAN_1834                | hypothetical protein                     | 07266; <b>95</b>                                                             | 07187; <b>88</b> |
| MXAN_1835                | hypothetical protein                     | 07265; <b>95</b>                                                             | 07186; <b>93</b> |
| MXAN_1836                | putative phage tail protein              | 07264; <b>94</b>                                                             | 07185; <b>93</b> |
| MXAN_1837                | hypothetical protein                     | 07263; <b>92</b>                                                             | 07184; <b>95</b> |

|           |                                                  |                              |                              |
|-----------|--------------------------------------------------|------------------------------|------------------------------|
| MXAN_1838 | hypothetical protein                             | 07262; <b>97</b>             | 07183; <b>96</b>             |
| MXAN_1839 | hypothetical protein                             | 07261; <b>90</b>             | 07182; <b>87</b>             |
| MXAN_1840 | hypothetical protein                             | 07260; <b>96</b>             | 07181; <b>96</b>             |
| MXAN_1841 | hypothetical protein                             | 07259; <b>78</b>             | 07180; <b>77</b>             |
| MXAN_1842 | hypothetical protein                             | 07258; <b>90</b>             | 07179; <b>88</b>             |
| MXAN_1843 | hypothetical protein                             | 07257; <b>94</b>             | 07178; <b>92</b>             |
| MXAN_1844 | hypothetical protein                             | 07256; <b>96</b>             | 07177; <b>95</b>             |
| MXAN_1845 | putative phage late control gene D protein       | 07255; <b>99</b>             | 07417; <b>94</b>             |
| MXAN_1846 | hypothetical protein                             | 07254; <b>98</b>             | 07416; <b>89</b>             |
| MXAN_1847 | hypothetical protein                             | 07253; <b>95</b>             | 07415; <b>95</b>             |
| MXAN_1848 | phage tail tape measure protein, TP901 family    | 07251; <b>95</b>             | 07414; <b>93</b>             |
| MXAN_1849 | hypothetical protein                             | 07250; <b>98</b>             | 07413; <b>89</b>             |
| MXAN_1850 | hypothetical protein                             | 07249; <b>95</b>             | 07412; <b>94</b>             |
| MXAN_1851 | conserved hypothetical phage tail region protein | 07248; <b>97</b>             | 07411; <b>96</b>             |
| MXAN_1852 | putative phage tail sheath protein               | 07247; <b>95<sup>b</sup></b> | 07210; <b>93<sup>b</sup></b> |
| MXAN_1853 | putative phage sheath protein                    | 07247; <b>91<sup>b</sup></b> | 07210; <b>89<sup>b</sup></b> |
| MXAN_1854 | hypothetical protein                             | 07246; <b>84</b>             | 07409; <b>93</b>             |
| MXAN_1855 | IPT/TIG domain protein                           | 07245; <b>97</b>             | 07408; <b>93</b>             |
| MXAN_1856 | hypothetical protein                             | 07244; <b>97</b>             | 07407; <b>96</b>             |
| MXAN_1857 | hypothetical protein                             | 07243; <b>94</b>             | 07406; <b>96</b>             |
| MXAN_1858 | hypothetical protein                             | 07242; <b>88</b>             | 07405; <b>86</b>             |
| MXAN_1859 | hypothetical protein                             | 07241; <b>95</b>             | 07404; <b>96</b>             |
| MXAN_1860 | hypothetical protein                             | 07240; <b>95</b>             | 07403; <b>95</b>             |
| MXAN_1861 | hypothetical protein                             | 07239; <b>94</b>             | 07402; <b>91</b>             |
| MXAN_1862 | phage-like element pbsx protein xkdg             | 07237; <b>99</b>             | 07401; <b>97</b>             |
| MXAN_1863 | hypothetical protein                             | 07236; <b>96</b>             | 07399; <b>75</b>             |
| MXAN_1864 | N6 adenine-specific DNA methyltransferase        | 07235; <b>96</b>             | 07398; <b>95</b>             |
| MXAN_1865 | hypothetical protein                             | 07234; <b>89</b>             | 07397; <b>84</b>             |
| MXAN_1866 | putative phage head morphogenesis protein        | 07232; <b>92</b>             | 07396; <b>93</b>             |
| MXAN_1867 | hypothetical protein                             | 07231; <b>95</b>             | 07395; <b>91</b>             |
| MXAN_1868 | phage portal protein, PBSX family                | 07230; <b>95</b>             | 07394; <b>95</b>             |
| MXAN_1869 | hypothetical protein                             | 07226; <b>92</b>             | none                         |
| MXAN_1870 | putative phage terminase, ATPase subunit         | 07627; <b>96</b>             | none                         |

|           |                                                     |                                      |                  |
|-----------|-----------------------------------------------------|--------------------------------------|------------------|
| MXAN_1871 | putative terminase, atpase subunit                  | none                                 |                  |
| MXAN_1872 | putative bacteriophage L54a, antirepressor          | 07633; <b>99</b>                     | 07625; <b>98</b> |
| MXAN_1873 | site-specific recombinase, phage integrase family   | none                                 |                  |
| MXAN_1874 | hypothetical protein                                | 07551; <b>89</b>                     | 07606; <b>93</b> |
| MXAN_1875 | hypothetical protein                                | 07552; <b>89</b>                     | 07605; <b>94</b> |
| MXAN_1876 | exonuclease                                         | 07554; <b>97</b>                     | 07603; <b>95</b> |
| MXAN_1877 | hypothetical protein                                | 07555; <b>95</b>                     | 07602; <b>93</b> |
| MXAN_1878 | hypothetical protein                                | 07556; <b>88</b>                     | 07601; <b>85</b> |
| MXAN_1879 | hypothetical protein                                | 07557; <b>68</b>                     | 07332; <b>94</b> |
| MXAN_1880 | hypothetical protein                                | 07558; <b>86</b>                     | 07331; <b>86</b> |
| MXAN_1881 | hypothetical protein                                | 07559; <b>95</b>                     | 07330; <b>91</b> |
| MXAN_1882 | putative helicase, ATP-dependent, intein-containing | 07560; <b>81</b>                     | 07329; <b>90</b> |
| MXAN_1883 | hypothetical protein                                | 07528 & 07561; <b>99<sup>c</sup></b> | 07328; <b>94</b> |
| MXAN_1884 | hypothetical protein                                | 07527; <b>88</b>                     | 07327; <b>99</b> |
| MXAN_1885 | putative bacteriophage related protein              | 07525; <b>92</b>                     | 07326; <b>95</b> |
| MXAN_1886 | hypothetical protein                                | 07524; <b>88</b>                     | 07325; <b>81</b> |
| MXAN_1887 | site-specific recombinase, resolvase family         | 07523; <b>96</b>                     | 07324; <b>97</b> |
| MXAN_1888 | hypothetical protein                                | 07522; <b>93</b>                     | 07323; <b>93</b> |
| MXAN_1890 | hypothetical protein                                | 07521; <b>84</b>                     | 07322; <b>92</b> |
| MXAN_1891 | hypothetical protein                                | none                                 | 07321; <b>91</b> |
| MXAN_1892 | putative serine/threonine protein kinase            | 07519; <b>86</b>                     | 07320; <b>99</b> |
| MXAN_1893 | hypothetical protein                                | none                                 | 07319; <b>98</b> |
| MXAN_1894 | DNA-binding protein                                 | 07518; <b>87</b>                     | 07318; <b>99</b> |
| MXAN_1895 | DNA-binding protein                                 | 07517; <b>66</b>                     | 07317; <b>98</b> |
| MXAN_1896 | serine/threonine protein kinase                     | 07516; <b>68</b>                     | 07316; <b>87</b> |
| MXAN_1897 | hypothetical protein                                | 07515; <b>58</b>                     | 07315; <b>61</b> |
| MXAN_1898 | hypothetical protein                                | 07514; <b>56</b>                     | 07314; <b>53</b> |
| MXAN_1899 | hypothetical protein                                | none                                 |                  |
| MXAN_1900 | hypothetical protein                                | 07511; <b>68</b>                     | 07312; <b>70</b> |
| MXAN_1901 | transposase, IS5 family                             | none                                 |                  |

<sup>a</sup>paralogs

<sup>b</sup>fusion protein of MXAN\_1852 and MXAN\_1853

<sup>c</sup>two contigs that each partly cover MXAN\_1883

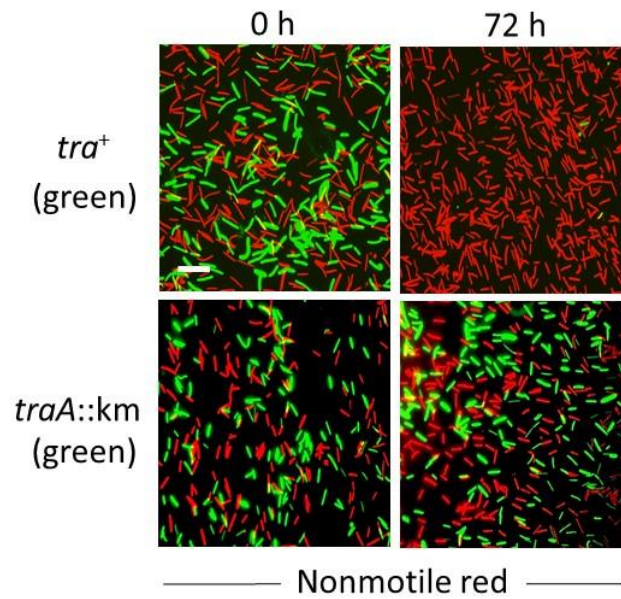

**Fig. S1.** Antagonism of A-motile cells by nonmotile cells is Tra-dependent. A nonmotile mCherry-labeled strain (DW1048) was mixed 1:1 with A-motile strains labeled with GFP that were either *tra*<sup>+</sup> (DW709) or *traA::km* (DW1613). At indicated times, cells were harvested and viewed on glass slides. Fluorescence micrographs were merged from the green and red channel. Bar, 10  $\mu$ m.

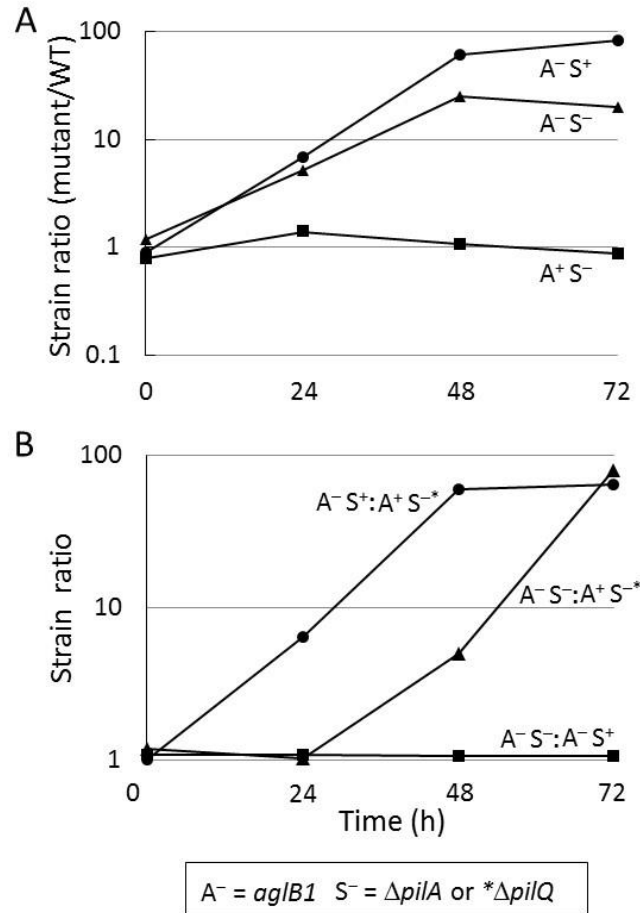

**Fig. S2.** A-motility mutants antagonize A-motile strains. A) An A<sup>+</sup>S<sup>+</sup> strain labeled with mCherry (DW1616; WT) was mixed at a 1:1 ratio with three different types of motility mutants labeled with GFP (DW709, DK8605, and DK8606; phenotypes shown). The ratio of the strain mixtures was monitored over 72 h by harvesting cells from ¼ CTT agar plates and enumerating cell ratios by fluorescence microscopy. See Figure S1 for a representative panel image. B) All possible combinations of motility mutants were mixed and their fitness assessed as described in A. GFP-labeled strains were DK8605 and DK8606, and mCherry-labeled strains were DW1048 and DW1619. The *aglB1* allele was used for A-motility defects and all of these strains were derived from DK1217, whereas S-motility defects were caused by  $\Delta pilA$  or  $\Delta pilQ$  alleles and all strains were derived from DK1622. See Table 1 for strain details.



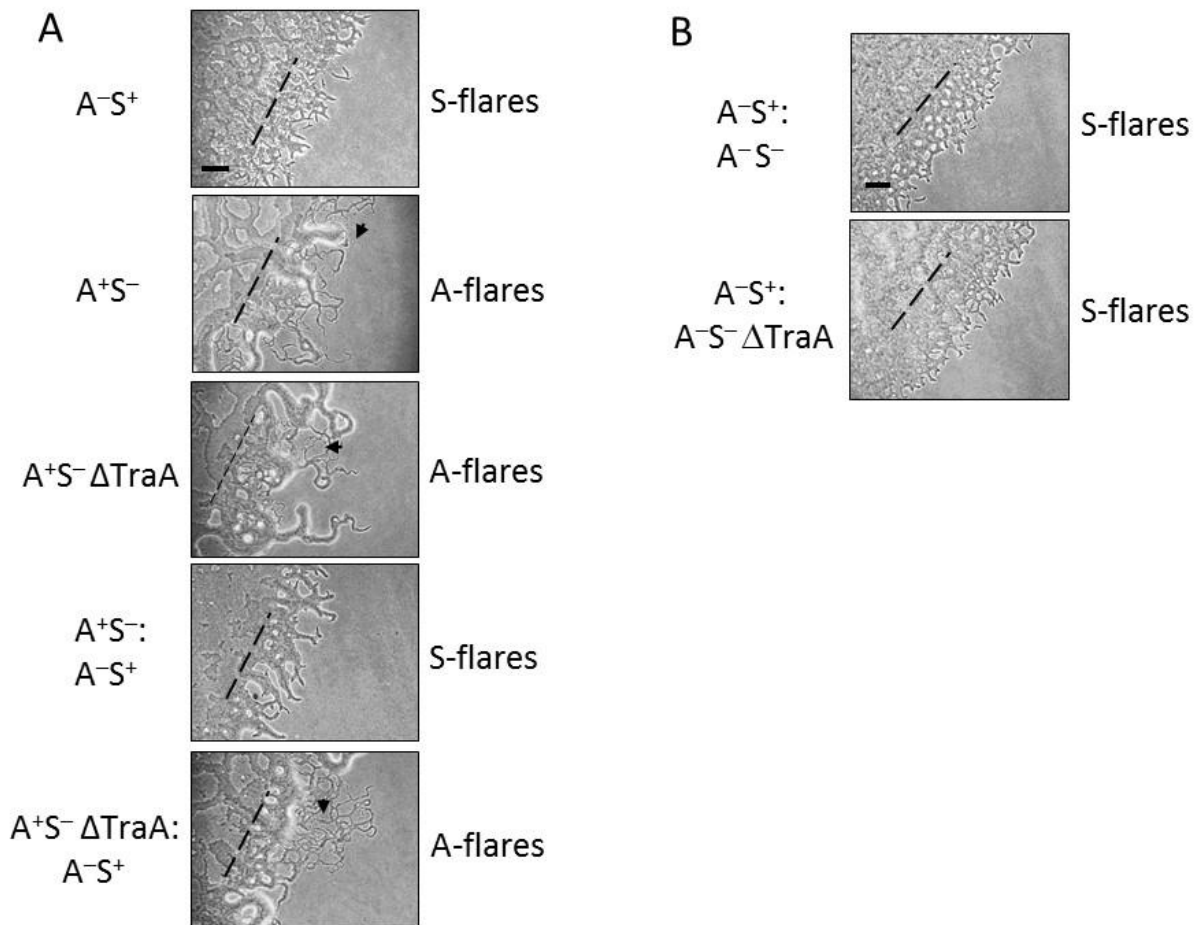

**Fig. S3.** Antagonism of A-motility by an  $A^-S^+$  mutant. A) Aliquots of indicated monocultures or mixed cultures (1:1 ratio) were placed on TPM agar and incubated for 24 h. Arrows mark individual cells or small groups of cells (A-flares), which are characteristic of A-motility and were absent from the  $A^+S^-:A^-S^+$  strain mixture (which instead had S-flares). B) S-motile cells were not inhibited by nonmotile cells. Strains with indicated phenotypes were mixed 1:1 on TPM agar and incubated for 24 h. Strains used: DK1217 ( $A^+S^-$ ), DK8615 ( $A^-S^+$ ), DW1482 ( $A^+S^- \Delta traA$ ), DK8601 ( $A^-S^-$ ), and DW1467 ( $A^-S^- \Delta traA$ ). Dashed lines, initial inoculum edge; bars, 100  $\mu$ m.

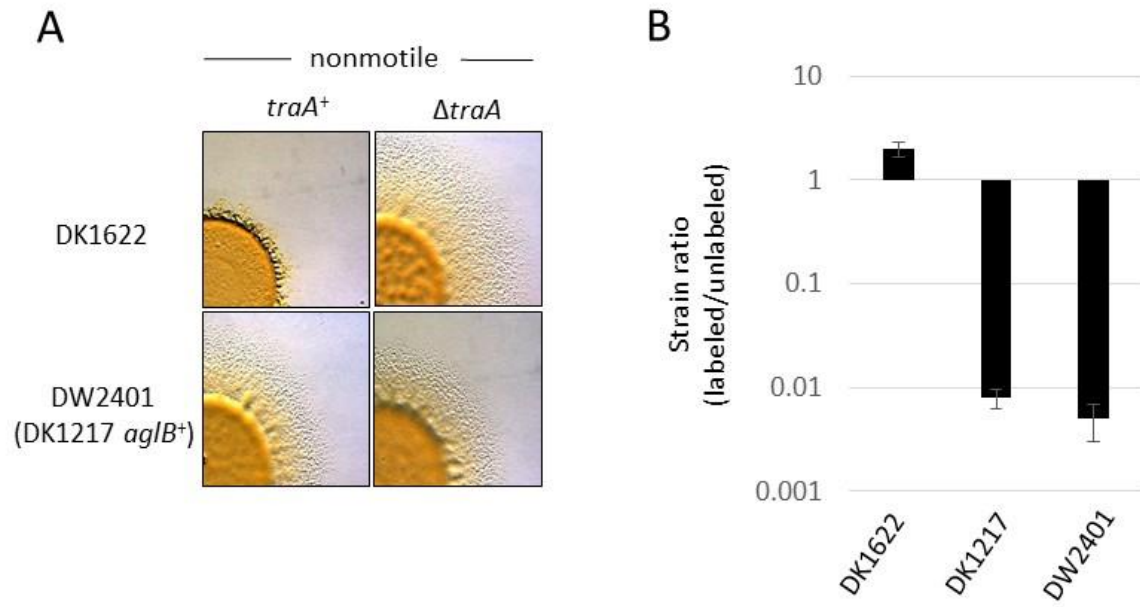

**Fig. S4.** The *aglB1* defect does not cause antagonism. A) Nonmotile strain DK8601 inhibits swarming of WT ( $A^+S^+$ ; DK1622) by a Tra-dependent mechanism ( $\Delta traA$ , DW1467). In contrast, an *aglB1* mutant (DK1217) rescued by an *aglB*<sup>+</sup> construct ( $A^+S^+$ ; DW2401,) exhibits no inhibition. B) A susceptible strain that was labeled with mCherry (DW1619) was mixed 1:1 with a non-aggressor (DK1622) or a parental aggressor strain (DK1217) or DW2401. After 72 h, strain fitness was microscopically determined by counting labeled and unlabeled cells.

## MOVIE LEGENDS

**Movie S1.** Time-lapse microscopy shows A-motile cells are inhibited from moving when mixed with nonmotile cells. Strains DK8615 and DK8601 were mixed 1:1 and visualized following a one day incubation on a ¼ CTT 1% agarose pad with 2 mM CaCl<sub>2</sub>. Cells at the colony edge were viewed with a 20× phase contrast objective. Note, many of the cells at the swarm edge are not moving or are moving slowly. In two cases cells marked with arrows lyse. For a comparison see Move S2 where an isogenic *ΔtraA* mutant was instead mixed. A 2-h movie was made with frames captured at 30-sec intervals. Movie format is MP4.

**Movie S2.** Time-lapse microscopy shows that a *ΔtraA* mutant elicits wild-type A-motility when incubated with nonmotile cells. Strains DW1482 and DK8601 were mixed 1:1 and incubated as described in Movie S1 legend. A 1-h movie was made with frames captured at 30-sec intervals. Movie format is MP4.

## REFERENCES

1. **Wall D, Kolenbrander PE, Kaiser D.** 1999. The *Myxococcus xanthus pilQ (sgIA)* gene encodes a secretin homolog required for type IV pilus biogenesis, social motility, and development. *J Bacteriol* **181**:24-33.
2. **Youderian P, Burke N, White DJ, Hartzell PL.** 2003. Identification of genes required for adventurous gliding motility in *Myxococcus xanthus* with the transposable element mariner. *Mol Microbiol* **49**:555-570.
3. **Sun M, Wartel M, Cascales E, Shaevitz JW, Mignot T.** 2011. Motor-driven intracellular transport powers bacterial gliding motility. *Proc Natl Acad Sci U S A* **108**:7559-7564.
4. **Dey A, Wall D.** 2014. A genetic screen in *Myxococcus xanthus* identifies mutants that uncouple outer membrane exchange from a downstream cellular response. *J Bacteriol* **196**:4324-4332.
5. **Julien B, Kaiser AD, Garza A.** 2000. Spatial control of cell differentiation in *Myxococcus xanthus*. *Proc Natl Acad Sci U S A* **97**:9098-9103.
6. **Wei X, Pathak DT, Wall D.** 2011. Heterologous protein transfer within structured myxobacteria biofilms. *Mol Microbiol* **81**:315-326.
7. **Pathak DT, Wei X, Bucuvalas A, Haft DH, Gerloff DL, Wall D.** 2012. Cell contact-dependent outer membrane exchange in myxobacteria: Genetic determinants and mechanism. *PLoS Genet* **8**:e1002626.
8. **Pathak DT, Wei X, Dey A, Wall D.** 2013. Molecular recognition by a polymorphic cell surface receptor governs cooperative behaviors in bacteria. *PLoS Genet* **9**:e1003891.
